# Supplementary material for: Systematic Identification of Key Functional Modules and Genes in Gastric Cancer
Source: Hindawi journal article supplement (doi:10.1155/2020/8853348), 2020-01-01
Supplement: f1 [file 8853348.f1.pdf]

Purple module

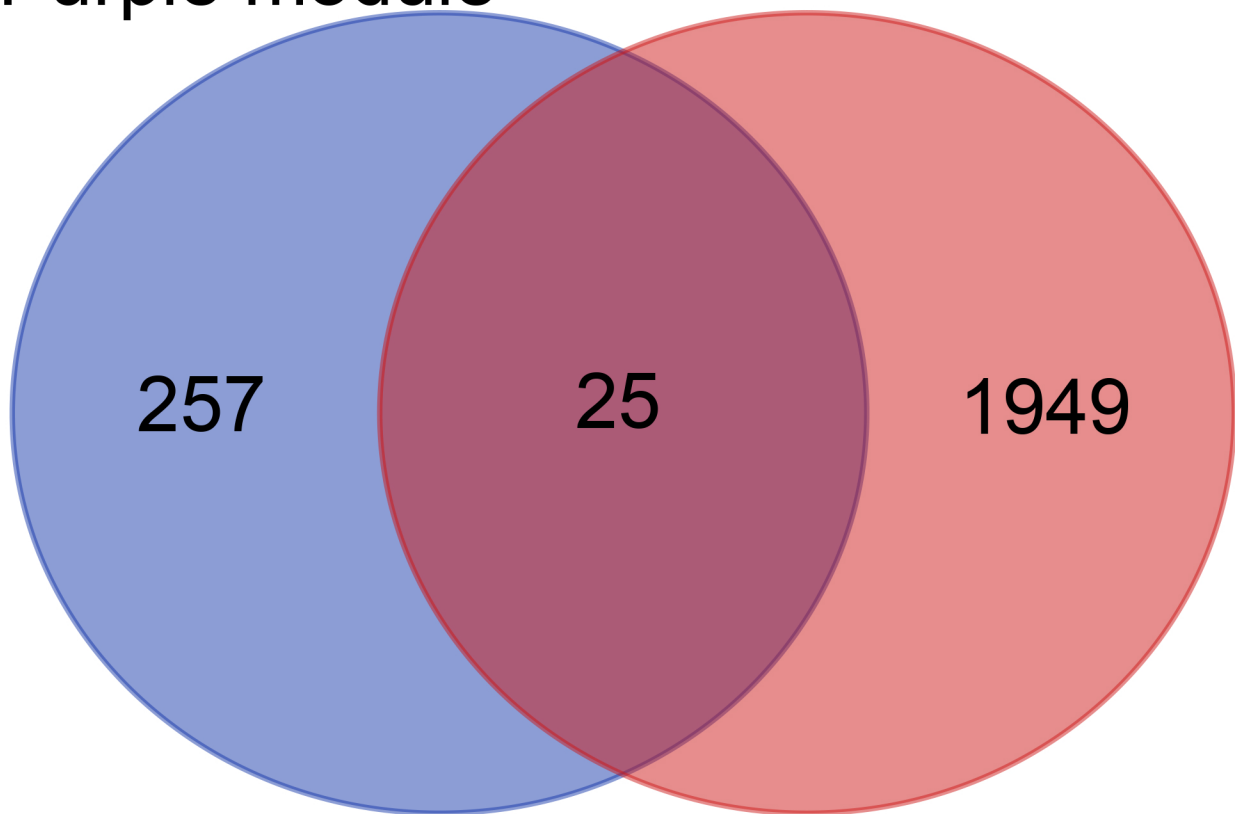

DEGs
